# Supplementary material for: Dual resistance to alkali metals and SO2: vanadium and cerium supported on sulfated zirconia as an efficient catalyst for NH3-SCR
Source: Royal Society of Chemistry journal article supplement (doi:10.1039/c6cy01502f), 2016-01-01
Supplement: c6cy01502f1.pdf [file c6cy01502f1.pdf]

## **Dual resistance to alkali metals and SO<sub>2</sub>: vanadium and cerium supported on sulfated zirconia as an efficient catalyst for NH<sub>3</sub>-SCR**

Shan Gao,<sup>a,b</sup> Penglu Wang,<sup>a,b</sup> Feixiang Yu,<sup>a,b</sup> Haiqiang Wang,<sup>a, b\*</sup> Zhongbiao Wu,<sup>a,b</sup>

[a] Key Laboratory of Environment Remediation and Ecological Health, Ministry of Education, College of Environmental & Resources Science, Zhejiang University, 310058 Hangzhou, P.R. China; Fax: +86 571 8795 3088; Tel: +86 571 8795 3088; E-mail: [haiqiangwang@zju.edu.cn](mailto:haiqiangwang@zju.edu.cn).

[b] Zhejiang Provincial Engineering Research Center of Industrial Boiler & Furnace Flue Gas Pollution Control, Hangzhou 310027, P.R. China.

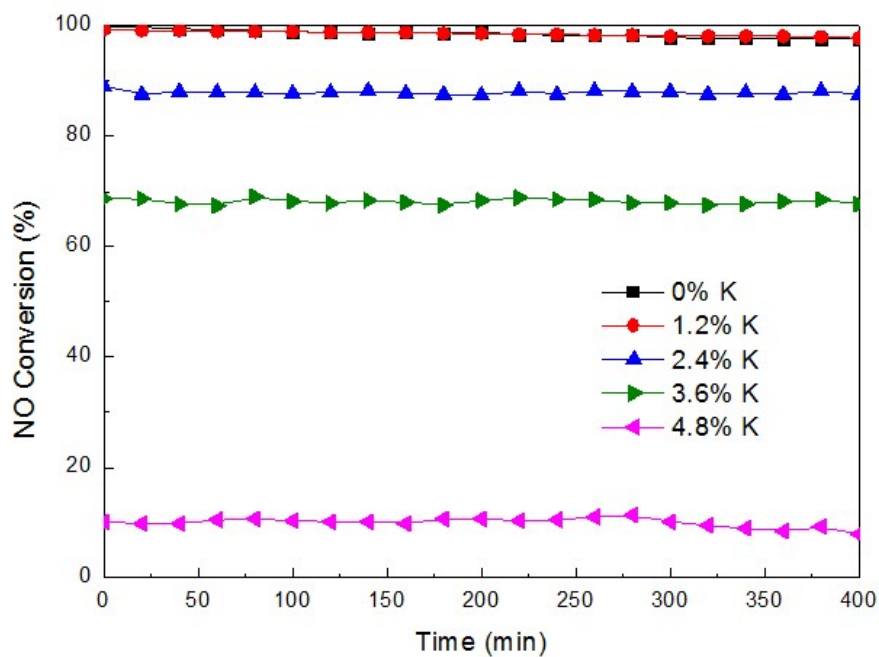

Fig. S1. The effect of SO<sub>2</sub> on NO conversion for CeVSZ catalysts with increasing K amounts.

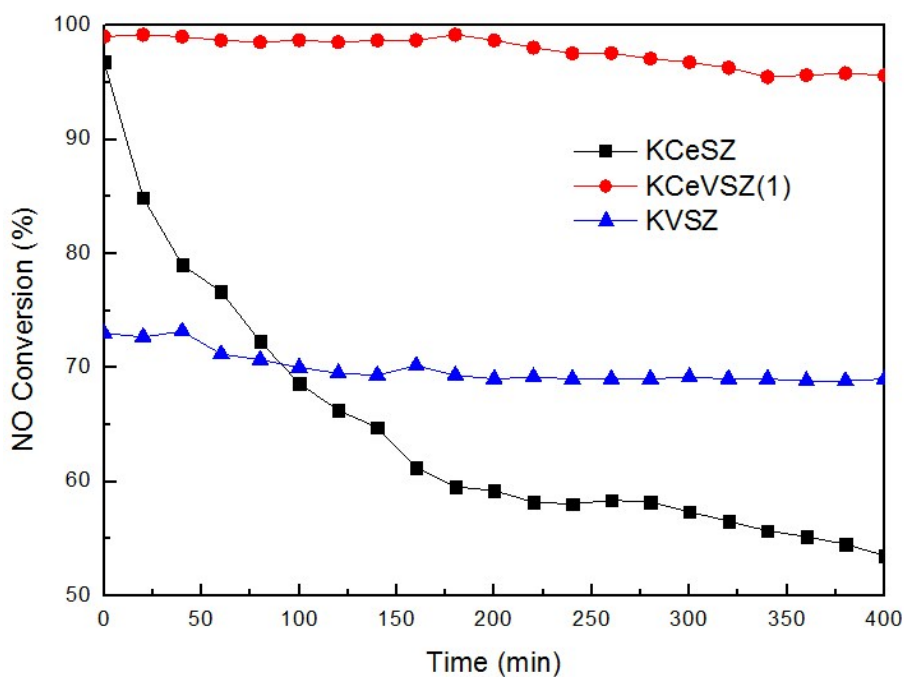

Fig. S2. NO conversion for catalysts in the presence of K, SO<sub>2</sub>, and H<sub>2</sub>O at 350 °C.

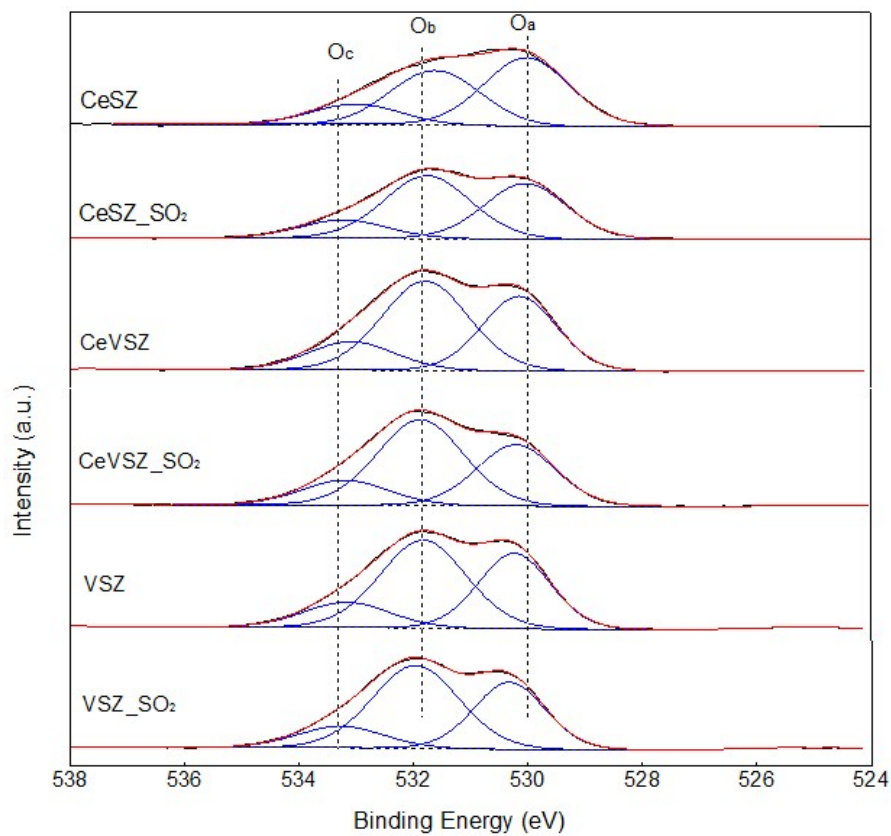

**Fig. S3.** XPS spectra of O 1s.

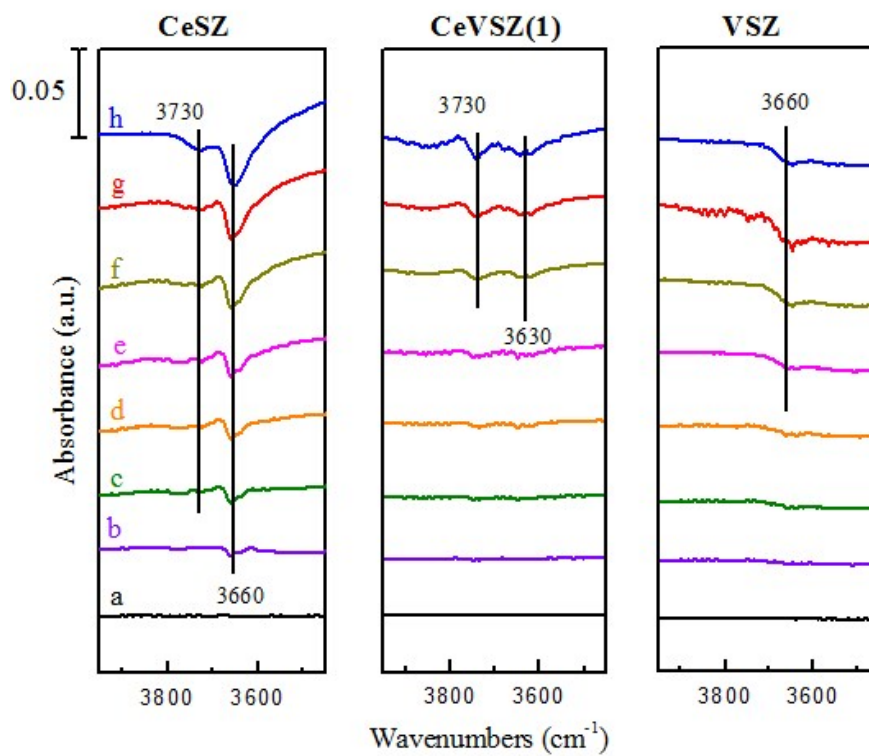

**Fig. S4.** DRIFT spectra of catalyst exposed to 600 ppm SO<sub>2</sub>/He + 3% O<sub>2</sub>/He at 350 °C for (a) 0

---

min, (b) 1 min, (c) 3 min, (d) 5 min, (e) 10 min, (f) 20 min, (g) 30 min, and (h) He perging for 30 min

(at high wavenumbers).
